# Supplementary material for: Conservation and Diversification of Circadian Rhythmicity Between a Model Crassulacean Acid Metabolism Plant Kalanchoë fedtschenkoi and a Model C3 Photosynthesis Plant Arabidopsis thaliana
Source: Front Plant Sci. 2018 Nov 28;9:1757. doi: 10.3389/fpls.2018.01757 (PMC6279919; doi:10.3389/fpls.2018.01757)
Supplement: Supplementary file 8 [file Table_8.xlsx]

## Sheet: Sheet1
Supplementary Table 8. Carboxylation genes in Kalanchoë fedtschenkoi and their orthologs in Arabidopsis thaliana. The Ortholog group types are described in the Results section and Figure 1B.
Gene Symbol	K. fedtschenkoi ID	Gene Description	Ortholog Group	Max Expression (FPKM)	K. fedtschenkoi Rhythmicity	K. fedtschenkoi Phase Call	A. thaliana ID	A. thaliana Rhythmicity	A. thaliana Phase Call	Phase Shift (hours)
β-CA	Kaladp0018s0287	Beta carbonic anhydrase	Type 5	219.37	rhythmic	20
β-CA	Kaladp0018s0289	Beta carbonic anhydrase	Type 5	352.68	rhythmic	20
β-CA	Kaladp0034s0051	Beta carbonic anhydrase	Type 5	267.513	rhythmic	4
PPCK1	Kaladp0037s0517	Phosphoenolpyruvate carboxylase kinase	Type 1	1187.84	rhythmic	20	AT3G04530
							AT1G08650	rhythmic	8	12
PPCK2	Kaladp0604s0001	Phosphoenolpyruvate carboxylase kinase	Type 1	376.3	rhythmic	16	AT3G04530
							AT1G08650	rhythmic	8	8
PEPC2	Kaladp0048s0578	Phosphoenolpyruvate carboxylase 2	Type 1	280.38	rhythmic	18	AT2G42600
							AT3G14940	rhythmic	20	2
							AT1G68750
							AT1G53310	rhythmic	12	6
PEPC1	Kaladp0095s0055	Phosphoenolpyruvate carboxylase 1	Type 1	8338.11	rhythmic	12	AT2G42600
							AT3G14940	rhythmic	20	8
							AT1G68750
							AT1G53310	rhythmic	12	0
MDH	Kaladp0001s0257	Malate dehydrogenase	Type 1	383.29	rhythmic	12	AT2G22780	rhythmic	12	0
MDH	Kaladp0022s0111	Malate dehydrogenase	Type 1	43.82			AT2G22780	rhythmic	12	0
MDH	Kaladp0082s0194	Malate dehydrogenase	Type 3	1925.18	rhythmic	8	AT5G56720
							AT5G43330
							AT1G04410
ALMT	Kaladp0024s0194	Tonoplast aluminum-activated malate transporter	Type 2	147.01			AT1G25480
							AT3G18440	rhythmic	8
							AT2G17470
							AT1G18420
							AT1G68600
ALMT6	Kaladp0073s0021	Tonoplast aluminum-activated malate transporter 6	Type 1	440.84	rhythmic	2	AT1G25480
							AT3G18440	rhythmic	8	6
							AT2G17470
							AT1G18420
							AT1G68600
ALMT6	Kaladp0062s0038	Tonoplast aluminum-activated malate transporter	Type 1	66.01	rhythmic	16	AT1G25480
							AT3G18440	rhythmic	8	8
							AT2G17470
							AT1G18420
							AT1G68600
