# Supplementary material for: Conservation and Diversification of Circadian Rhythmicity Between a Model Crassulacean Acid Metabolism Plant Kalanchoë fedtschenkoi and a Model C3 Photosynthesis Plant Arabidopsis thaliana
Source: Front Plant Sci. 2018 Nov 28;9:1757. doi: 10.3389/fpls.2018.01757 (PMC6279919; doi:10.3389/fpls.2018.01757)
Supplement: Supplementary file 9 [file Table_9.xlsx]

## Sheet: Sheet1
Supplementary Table 9. Decarboxylation genes in Kalanchoë fedtschenkoi and their orthologs in Arabidopsis thaliana. The Ortholog group types are described in the Results section and Figure 1B.
Gene Symbol	K. fedtschenkoi ID	Gene Description	Ortholog Group	Max Expression (FPKM)	K. fedtschenkoi Rhythmicity	K. fedtschenkoi Phase Call	A. thaliana ID	A. thaliana Rhythmicity	A. thaliana Phase Call	Phase Shift (hours)
TDT	Kaladp0042s0251	Tonoplast dicarboxylate transporter	Type 1	1617.63	rhythmic	2	AT5G47560	rhythmic	24	2
PPDK	Kaladp0039s0092	Pyruvate, orthophosphate dikinase	Type 5	4744.54	rhythmic	24
PPDK	Kaladp0076s0229	Pyruvate, orthophosphate dikinase	Type 2	9054.27			AT4G15530	rhythmic	16	8
PPDK-RP	Kaladp0010s0106	PPDK regulatory protein	Type 3	121.13	rhythmic	8	AT4G21210
PPDK-RP	Kaladp0060s0363	PPDK regulatory protein	Type 3	81.78	rhythmic	10	AT4G21210
NAD-ME	Kaladp0033s0124	NAD-dependent malic enzyme	Type 1	269.31	rhythmic	2	AT4G00570	rhythmic	16	10
							AT2G13560
NADP-ME	Kaladp0092s0166	NADP-malic enzyme	Type 1	2948.96	rhythmic	24	AT1G79750	rhythmic	20	4
							AT5G11670	rhythmic	12	12
							AT5G25880	rhythmic	16	8
							AT2G19900	rhythmic	24	0
